# Supplementary material for: An olfactory self-test effectively screens for COVID-19
Source: PubMed Central journal article supplement (PMC9053292; doi:10.1038/s43856-022-00095-7), 2022-04-05
Supplement: 43856_2022_95_MOESM8_ESM.pdf [file 43856_2022_95_MOESM8_ESM.pdf]

**Supplementary Materials for:**

**An Olfactory Self-Test Effectively Screens for COVID-19**

Kobi Snitz<sup>1\*</sup>, Danielle Honigstein<sup>1\*</sup>, Reut Weissgross<sup>1\*</sup>, Aharon Ravia<sup>1\*</sup>, Eva Mishor<sup>1\*</sup>, Ofer Perl<sup>1\*</sup>, Shiri Karagach<sup>1</sup>, Abebe Medhanie<sup>1</sup>, Nir Harel<sup>2</sup>, Sagit Shushan<sup>1,3</sup>, Yehudah Roth<sup>3,4</sup>, Behzad Iravani<sup>5</sup>, Artin Arshamian<sup>5,6</sup>, Gernot Ernst<sup>7</sup>, Masako Okamoto<sup>8</sup>, Cindy Poo<sup>9</sup>, Niccolò Bonacchi<sup>9</sup>, Zachary Mainen<sup>9</sup>, Erminio Monteleone<sup>10</sup>, Caterina Dinnella<sup>10</sup>, Sara Spinelli<sup>10</sup>, Franklin Mariño-Sánchez<sup>11</sup>, Camille Ferdenzi<sup>12</sup>, Monique Smeets<sup>13</sup>, Kazushige Touhara<sup>8</sup>, Moustafa Bensafi<sup>12</sup>, Thomas Hummel<sup>14</sup>, Johan N. Lundström<sup>5,15</sup>, Noam Sobel<sup>1</sup>

<sup>1</sup> Department of Neurobiology, Weizmann Institute of Science, Rehovot, Israel

<sup>2</sup> Bezalel Academy of Fine Arts and Design, Department of Fine Arts, Jerusalem, Israel

<sup>3</sup> Department of Otolaryngology- Head & Neck Surgery, Edith Wolfson Medical Center, Holon, Israel

<sup>4</sup> Sackler Faculty of Medicine, Tel Aviv University, Tel Aviv, Israel

<sup>5</sup> Department of Clinical Neuroscience, Karolinska Institutet, Stockholm, Sweden

<sup>6</sup> Department of Psychology, Stockholm University, Stockholm, Sweden

<sup>7</sup> Psychological institute, Oslo university, Oslo, Norway

<sup>8</sup> Department of Applied Biological Chemistry, Graduate School of Agricultural and Life Sciences, The University of Tokyo, Tokyo, Japan

<sup>9</sup> Champalimaud Research, Champalimaud Centre for the Unknown, Lisbon, Portugal

<sup>10</sup> Department of Agriculture, Food, Environment and Forestry, University of Florence, Florence, Italy

<sup>11</sup> Rhinology and Skull Base Surgery Unit. Otorhinolaryngology Department. Ramón y Cajal University Hospital. Madrid, Spain

<sup>12</sup> Lyon Neuroscience Research Center, CNRS - INSERM - University Claude Bernard of Lyon, Lyon, France

<sup>13</sup> Faculty of Social and Behavioral Sciences, Utrecht University, Utrecht, the Netherlands

<sup>14</sup> Smell and Taste Clinic, Department of Otorhinolaryngology, TU Dresden, Dresden, Germany

<sup>15</sup> Monell Chemical Senses Center, Philadelphia, Pennsylvania, USA

\*These authors contributed equally

| Category 1                   | Category 2    | Category 3              | Category 4               | Category 5             |
|------------------------------|---------------|-------------------------|--------------------------|------------------------|
| Vanilla extract              | Peanut butter | Mustard (Dijon)         | Garlic (freshly chopped) | Your toothpaste        |
| Nutella                      | Coconut oil   | Vinegar (white)         | Camembert cheese         | Your hand soap         |
| Honey                        | Olive oil     | Horseradish (jar)       | Canned tune              | Your laundry detergent |
| Strawberry jam               | Basil         | Wasabi                  | Blue cheese              | Your shampoo           |
| Apricot jam                  | Oregano       | Onion (freshly chopped) | Canned sardines          | Your hand cream        |
| Apple juice (not fresh)      | Parsley       | Vinegar (apple)         | Mushrooms                | Your body lotion       |
| Orange juice (not fresh)     | Cilantro      | Black pepper (ground)   | Boiled egg               | Your perfume           |
| Lemonade (not fresh)         | Dill          | Menthol gum             | Pickled herring          | Your hand sanitizer    |
| Peach nectar (not fresh)     | Cardamom      | Mint (fresh)            | Cumin                    | Your sunscreen         |
| Pear nectar (not fresh)      | Thyme         | Mint (gum)              | Soy sauce                | Your baby oil          |
| Grapefruit juice (not fresh) | Nutmeg        | Mint (tea)              | Sauerkraut               |                        |
| Pineapple juice (not fresh)  | Caraway       | Sesame oil              | Coffee (ground)          |                        |
| Banana nectar (not fresh)    | Bay leaves    | Vodka                   | Coffee (instant)         |                        |
| Cinnamon                     | Ketchup       | Clove                   | Tea (black)              |                        |
| Maple syrup                  |               | Vinegar (balsamic)      | Tea (earl gray)          |                        |
|                              |               | Vinegar (red)           |                          |                        |
|                              |               | Mustard (ordinary)      |                          |                        |

**Supplementary Table 1: The list of odorants participants could select from**

Participants were instructed to select one odorant from each of the 5 categories, summing at 5 odorants for rating of intensity and pleasantness.
