# Supplementary material for: An olfactory self-test effectively screens for COVID-19
Source: PubMed Central journal article supplement (PMC9053292; doi:10.1038/s43856-022-00095-7), 2022-04-05
Supplement: 43856_2022_95_MOESM9_ESM.pdf [file 43856_2022_95_MOESM9_ESM.pdf]

## **Description of Additional Supplementary Files**

**File Name:** Supplementary Data 1

**Description:** This file contains all the initial manuscript raw data

**File Name:** Supplementary Data 2

**Description:** This file contains all the manuscript raw data for the continuation (1464 participants)

**File Name:** Supplementary Data 3

**Description:** Source Data Figure 1

**File Name:** Supplementary Data 4

**Description:** Source Data Figure 2

**File Name:** Supplementary Data 5

**Description:** Source Data Figure 3

**File Name:** Supplementary Data 6

**Description:** Source Data Figure 4

**File Name:** Supplementary Data 7

**Description:** Source Data Figure 5
